# Supplementary material for: Snow depth in high-resolution regional climate model simulations over southern Germany – suitable for extremes and impact-related research?
Source: Copernicus journal article supplement (doi:10.5194/tc-2023-137), 2023-09-12
Supplement: Supplementary file [file tc-2023-137-AC1-supplement.pdf]

Dear Reviewer,

We thank you for your constructive critique and the valuable comments and suggestions to improve the quality of the manuscript. We address your comments (dark grey) with our responses (blue) in the following. We think that the outlined additional analysis based on your recommendations will help to improve the study.

Poschlod and Daoz analyze snow depth from two high-resolution climate models and one reanalysis for an area in Southern Germany. The purpose of the study is not clear, since no research aims are stated. The title hints to “suitable for extremes and impact-related research?”, however, most of the manuscript is just model evaluation and little on extremes. Some of the impact-related variables are highly questionable. There are some major concerns on parts of the methodology, and the manuscript needs a clearer structure before of publication quality.

### Major points

- I miss a description of why the research setup. What are your aims and/or hypotheses? Why snow depth? It is not a state variable, and you never discuss how different density estimates might impact your results. Why in-situ observation and not remote sensing? Again, the mismatch of point-vs-grid could be highlighted more clearly, and also the impact of resolution, since I guess a point is more representative for the 1.5km cell than for the 9km cell.

### Hypothesis / Aims:

Thank you for this comment. We will better clarify the hypothesis and aims. The main question of the study is: Can new-generation high-resolution regional climate models represent snow depth dynamics at high temporal (daily) and high spatial detail? One according hypothesis is: The high-resolution *dynamical* downscaling of ERA5 atmosphere (via CCLM & WRF) can add value compared to the state-of-the-art ERA5L reanalysis product. This aim is indeed related to “just model evaluation”, however at high spatio-temporal scales. This is very relevant for impact research.

Further, we try to show the complexity of this topic by highlighting elevation bias, climatic driver biases, albedo, and land cover. We also touched upon the point-vs-grid mismatch (L405-409), but we will further enhance the discussion in that regard. We will also discuss snow density as uncertainty source (thank you for this hint).

### Motivation / Relevance:

Impact research needs information about impactful events at the local scale. Climate change affects the dynamics and conditions, which is why observation-based analyses are limited. Often, coarse-resolution RCMs or even GCMs have been used to drive snow models at local/regional scale. However, bias adjustment, statistical downscaling and the de-coupling of the interactions of snow dynamics and climate (snow simulations do not feed back into the climate simulation) induce additional uncertainties and limitations.

The “new generation” of high-resolution RCMs could potentially directly provide snow depth information from their internal land surface / snow modules, which leads us to the guiding question: How good are they at representing snow depth?

#### Setup:

To answer the question and test the hypothesis, we need to:

- 1) explore high-resolution RCM simulations,
- 2) which cover not only single years but climatological periods (~ 30 years) to represent the variability and extremes
- 3) and which are driven by reanalysis in order to be able to compare to observations
- 4) define a baseline (in our case ERA5L)
- 5) define a reference (in our case in-situ observations)

1) – 3) strongly limits the choice of available simulations. The CCLM and WRF simulations are the simulations, which we found publicly available.

4) ERA5L as global land reanalysis is the state-of-the-art reanalysis product at 9km resolution, which is also driven by the same climate (ERA5 atmosphere) and therefore comparable.

5) For snow depth, in-situ observations are the typical validation reference (see e.g. <https://tc.copernicus.org/articles/15/1343/2021/>). However, based on your and the other reviewer’s suggestion, we will add remote sensing data for snow cover validation of the gridded simulations.

In addition to 1) – 5), we added the AMUNDSEN simulations driven by CCLM at the point scale. This setup was added in the course of the evaluation, where the CCLM showed strong systematic underestimation of any snow variable, while representing the climate better than the other models (lowest biases and errors). Hence, driven by the perspective of impact research, we wanted to explore how the separate snow model AMUNDSEN can make use of the well representative CCLM climate.

- L210: In case of heavy snowfall, compaction can be of larger magnitude than melt. (Also how do you derive this index in case of missing observation data - you allowed 30%, right?) Then for maximum accumulation, snowfall might be a better variable than increment in snow depth. And for maximum melt, SWE change (which is anyway the state variable in the model). I suggest removing these analyses. If you want to focus on extreme accumulation and melt, which of course are variables with significant societal impact, then you need to choose appropriate variables. And if you want to use snow depth as proxy instead, at least you have to prove it is meaningful compared to snowfall and SWE loss. Currently, they cannot be trusted, and therefore should be removed from the manuscript.

We follow your suggestion and remove these analyses from the manuscript.

- Your study focuses on low-elevation snow cover, and your station coverage is rather limited. Especially, all stations are below 1000m. This is important to acknowledge in discussion and research setup.

We will emphasize the elevation of the stations in the Introduction and Discussion. Also, the station coverage will be discussed as uncertainty source.

- Consequently, your evaluations, as they are know, are heavily influenced by low snow amounts. For example, you can have high values of relative errors for irrelevant snow amounts. (this is less an issue for high-alpine sites, where you have large snow amounts, related L510). This needs to be discussed. Even better would be analyses that distinguish by elevation or snow amount, or summary metrics/table that take this into account.

Thank you for this suggestion. We will divide the evaluation of mean snow depth and annual maxima of snow depth (Figs. 7, 9, 11) into different categories (either bins of elevations or bins of mean annual snow depths). We will further provide metrics supporting this distinction.

- The discussion on snow albedo as driver of biases is good. However, the important figure is in the supplement and one that is of minor use in the main part.

We will add Fig. S9 to the main manuscript.

#### Minor points:

- L20: improves relative to what? Numbers are somewhat in between.

Relative to CCLM, which is the driving climate for AMUNDSEN. We will clarify that.

- L23: “All models fail...” but observations do?

In the case of white Christmas (snow depth > 1 cm), we would assume that observations can diagnose these conditions. The term “predict” might be misleading in this sentence. We will change to: “The presence or absence of white Christmas is reproduced with Matthew's Correlation Coefficients of 0.49 (ERA5L), 0.51 (WRF), 0.66 (AMUNDSEN), and 0.67 (CCLM).”

Note: The use of the Matthew's Correlation Coefficient is discussed in later comments due to your suggestions.

- L25: what limitations?

The still remaining deviations in intensity and seasonality. We will change “limitations” to “deviations”.

- L26: Winter climate is more than just snow.

This statement was supposed to relate to precipitation and temperature and not snow. We will replace “winter climate” with “winter precipitation and temperature”.

- L26ff: Not sure. Abstract numbers suggest high accuracy, in fact. (after reading the manuscript the low biases make sense, because you only look at low elevations) For climate change research, another important factor is the boundary forcing from GCMs.

We will emphasize the low elevation already in the abstract and provide metrics tailored to the elevation ranges (see Major Comments).

- L66: Please be more specific. Blowing snow has already been implemented offline (10.5194/tc-15-743-2021) and also online (10.5194/gmd-16-719-2023).

Thank you for these references. We are happy to add them.

- L79: Less means there is something, what?

That was worded a too imprecisely: We haven't found any literature on snow depth extremes in climate models.

- Intro: Research aims are missing.

see Major Comments; will be added.

- Intro: Also, I would have expected something on snow studies in climate models, such as 10.3390/atmos10080463, 10.1007/s00382-012-1545-3, 10.5194/tc-17-3617-2023, etc

Thank you for these recommendations. We will add them to the introduction. Especially the extensive third study is very relevant.

- Table 1: would be easier to read if references were put in caption or similar. And ERA5-Land is not statistical downscaling.

We will make the table easier to read (either putting references in the caption or a table footnote – whatever the journals layout allows). The font size of the template is larger than the final journal layout – so tables look a bit unproportioned here.

The climatic drivers for ERA5-Land result from a linear interpolation (which can be called statistical downscaling). See <https://doi.org/10.5194/essd-13-4349-2021>: “ERA5-Land is driven by atmospheric forcing derived from ERA5 near-surface meteorology state and flux fields. The meteorological state fields are obtained from the lowest ERA5 model level (level 137), which is 10m above the surface, and include air temperature, specific humidity, wind speed, and surface pressure. The surface fluxes include downward shortwave and longwave radiation and liquid and solid total precipitation. These fields are interpolated from the ERA5 resolution of about 31 km to ERA5-Land resolution of about 9 km via a linear interpolation method based on a triangular mesh.”

Hence, the downscaling of the climate drivers from 31km ERA5 to 9km ERA5L is done via statistical interpolation.

- Sec 2.4: The number of snow stations is quite low, compared e.g. to (10.5194/tc-15-1343-2021). Did you take only stations which had snow, temp, and precip simultaneously? Also the maximum elevation is rather low... Since your study is about snow, maybe it would make more sense to include more observed snow data (not necessarily with temp and precip).

We first downloaded all stations in the study area via the R package rdwd (as also Matiu et al. 2021 in 10.5194/tc-15-1343-2021), however with the constraint that their measurement extends longer than 1988 (starting winter season of our analysis). That yielded 408 stations. this number seems to be comparable to Matiu et al. However, we remove all stations with more than 30% of missing snow depth data during the period 1987 – 2018. This results in the selection of the subset of stations in the article. Using stations with shorter coverage would distort some of the applied metrics in the article.

- Fig4: I don't see any large dependence between temp and precip (except for ERA5L), so maybe if your point is temp/precip bias depend on elevation biases, it would be better to put elevation bias as continuous x-scale (and not discrete point shape, which makes it hard to read).

Thank you for this suggestion. We will rearrange the figure as proposed.

- FigS2 is quite good and relevant, I suggest moving it into the main manuscript. Just make the elevation bins wider to reduce noise and have a constant line for ERA5L. Also elevation seems not to match between DWD and AMUNDSEN.

We will include Fig. S2 in the main article. The elevations of DWD and AMUNDSEN do not match as the AMUNDSEN elevation stems from CCLM, as the CCLM simulation is used as climatic driver.

- Plots with obs vs. sim would benefit from a 1:1 line

Will be added.

- L315: since your prevalence is 3:1, “substantial” is overstated, since you need to put FP/FN in context to prevalence

We will add Matthew's Correlation Coefficient (<https://doi.org/10.1016/j.patcog.2019.02.023>) as it is based on all four classes of the confusion matrix. We will introduce this metric briefly in section 2.5. We agree, that “substantial” is too harsh, and will refrain from interpreting the classification at this part of the article.

- L343: not necessarily just resolution, might be bias in the forcing (too wet, too cold)

We agree to your statement; however, we argue that the elevation bias is the dominant driver of the temperature bias in ERA5L (see Table 2,  $r = -0.88$ ). We will modify the sentence accordingly.

- L400: again, this is not only resolution!

Not only, but also. We will soften this statement.

- L474: overstated. You have overall accuracies between 70-90%, which is in range to the correlations for seasonal snow depth. So I assume also shorter-period analyses would be in the same line of accuracy, so you cannot distinguish here by length of the analysed period (only if you actually performed some analyses with your data for 1-2 week periods and then performed a comparison).

The accuracies are between 70-90%, however not the combination of precision (WRF: 49%, CCLM: 87%, ERA5L: 43%, AMUNDSEN: 61%) and recall (WRF: 86%, CCLM: 62%, ERA5L: 98%, AMUNDSEN: 91%). This results in the F<sub>1</sub>-scores of WRF: 0.62, CCLM: 0.72, ERA5L: 0.60, AMUNDSEN: 0.73. As the F<sub>1</sub>-score ignores true negatives, we will add Matthew's Correlation Coefficient (<https://doi.org/10.1016/j.patcog.2019.02.023>). These coefficients amount to 0.49 (ERA5L), 0.51 (WRF), 0.66 (AMUNDSEN), and 0.67 (CCLM).

One cannot compare this binary classification task (24<sup>th</sup>, 25<sup>th</sup>, 26<sup>th</sup> December with snow depth > 1cm) to the performance of seasonal snow depth. We will perform some analyses over shorter periods. We expect that for the winter season mean snow depth evaluation (as in Figs. 6 & 7), deviations over shorter periods may equal out (e.g. less snow in November and too much snow in February may lead to a “correct” mean winter snow depth). However, for tourism applications, often one-week periods are of major interest. For this analysis, we envision error metrics for running 7-day mean snow depths for different elevation categories.

- L488: not new, there have been many SnowMIPs (Essery and co.) showing the same...

Our study shows this big uncertainty now for a “low-elevation” region, whereas most other studies and SnowMIPs mostly focus on higher elevation. Furthermore, we show the variability in local precipitation and temperature, even if driven by the same large-scale atmospheric conditions (ERA5). We will revise this sentence to be more precise highlighting these two findings.

- L495: So what is better? Use the snow scheme from the climate model? Or take only meteo and apply higher complexity snow models? How does this fit with previous studies that used meteo forcing from climate models to drive snow models?

There is of course no simple answer. From the modeller’s perspective, a coupled snow model (ergo snow scheme from a climate model) would be “better”, as the snow simulation feeds back into the climate. However, if the climate forcing from the climate model is biased, the according modelled snow will also be biased. We would argue that high-resolution climate models enlarge the portfolio of tools for impact-relevant research. Analysis of the snow simulations is needed to decide if the climate model snow output might be sufficient, or the whole chain of bias adjustment, statistical downscaling and separate snow model is necessary. We will add that to the conclusion.

- General: Results have a lot of repetition on plots with maps and obs-sim scatter plots. You might consider aggregating the information to prove your point. For example, spatially averaged time series, summary by different elevation, etc.

Melt and accumulation will be removed. The remaining scatterplots will be rearranged with elevation bins. The “white Christmas” section will be enhanced by the new short-period analysis, where the map (Fig. 10) will be moved to the supplement. Instead a summary figure for the model performances for 7-day running windows (as proxy for timeframes relevant for the tourism sector) will be added.

The snow cover duration will be enhanced by the additional validation with MODIS data: MODIS TERRA snow cover (MOD10C1: <https://modis-snow-ice.gsfc.nasa.gov/?c=MOD10C1> ) at daily resolution. This evaluation will cover the winter seasons 2000/2001 to 2017/2018. These results will replace / modify Fig. 8.

Hence, repetition on plots with maps and obs-sim scatter plots will decrease.
